# Supplementary material for: Optimization of the energy for Breast monochromatic absorption X-ray Computed Tomography
Source: PubMed Central journal article supplement (PMC6739417; doi:10.1038/s41598-019-49351-2), 2019-09-11
Supplement: 41598_2019_49351_MOESM1_ESM.pdf [file 41598_2019_49351_MOESM1_ESM.pdf]

# Optimization of the energy for Breast monochromatic absorption X-ray Computed Tomography

Pasquale Delogu<sup>a\*</sup>, Vittorio Di Trapani<sup>a</sup>, Luca Brombal<sup>b</sup>, Giovanni Mettivier<sup>c</sup>, Angelo Taibi<sup>d</sup>, Piernicola Oliva<sup>e</sup>

<sup>a</sup> *Dipartimento di Scienze Fisiche, della Terra e dell'Ambiente, Università di Siena and I.N.F.N. Sezione di Pisa.*

<sup>b</sup> *Dipartimento di Fisica, Università di Trieste and I.N.F.N. Sezione di Trieste.*

<sup>c</sup> *Dipartimento di Fisica, Università di Napoli Federico II and I.N.F.N. Sezione di Napoli.*

<sup>d</sup> *Dipartimento di Fisica e Scienze della Terra, Università di Ferrara and I.N.F.N. Sezione di Ferrara.*

<sup>e</sup> *Dipartimento di Chimica e Farmacia, Università di Sassari and I.N.F.N. Sezione di Cagliari.*

## Additional Materials

In spatial domain, the noise of CT images is defined as the standard deviation  $\sigma$  measured on a homogeneous ROI (Region Of Interest). In frequency domain, the Noise Power Spectrum (NPS) describes the component of the variance  $\sigma^2$  for each spatial frequency. The variance  $\sigma^2$  can be calculated integrating the 2D NPS over the frequency domain <sup>1</sup>

$$\sigma^2 = \int_{-\infty}^{\infty} \int_{-\infty}^{\infty} NPS(f_x, f_y) df_x df_y \quad (1)$$

For CT reconstructions with FBP algorithm, the theoretical NPS has been previously reported by various authors. <sup>2,3,4,5,6</sup>

As reported by (Riederer *et al* 1978<sup>2</sup>), the NPS for a single reconstructed voxel can be written as follows:

$$NPS(q) = \frac{\pi \Delta x}{m \langle n \rangle} \cdot \frac{|W(q)|^2}{q} \quad (2)$$

where  $q = \sqrt{x^2 + y^2}$  is the spatial frequency in polar coordinates,  $\langle n \rangle$  the average number of photons per pixel per projection,  $m$  the number of projections,  $\Delta x$  the pixel size and  $|W(q)|$  the spectral response of the reconstruction algorithm. In particular (Kijewski and Judi 1987<sup>6</sup>), considering also the linear interpolations used by the reconstruction algorithm to estimate the projection values between the measured points during the backprojection, derived the following mathematical formulation for  $|W(q)|^2$  in FBP algorithm:

$$|W(q)|^2 = (\text{sinc}^2(\pi q \Delta x))^2 \cdot \sum_{k=-\infty}^{+\infty} \left( q - \frac{k}{\Delta x} \right)^2 \cdot \left| H \left( q - \frac{k}{\Delta x} \right) \right|^2 \cdot \text{rect}(q \Delta x - k) \quad (3)$$

In Eq. (3),  $\left(q - \frac{k}{\Delta x}\right)^2$  is the contribution of the Ram-Lak filter,  $\left(\text{sinc}^2(\pi q \Delta x)\right)^2$  the low-pass filtering introduced by the linear interpolations and  $H\left(q - \frac{k}{\Delta x}\right)$  is the apodization function which can be employed to reduce the high frequency components of the noise. The expressions for some function  $H(q)$  commonly employed in FBP are listed in Table A1.

| Filter      | $H(q)$                              |
|-------------|-------------------------------------|
| Shepp-Logan | $\text{sinc}(\pi q \Delta x)$       |
| Hamming     | $0.54 + 0.46 \cos(2\pi q \Delta x)$ |
| Hann        | $0.5 + 0.5 \cos(2\pi q \Delta x)$   |

Table A1: List of some apodization functions commonly employed in FBP algorithm

The noise variance for each reconstructed point derives from Eq. (1) and, in polar coordinates, is<sup>2</sup>

$$\sigma^2 = \int_0^{2\pi} d\theta \int_0^{+\infty} NPS(q) q dq = \frac{2\pi^2 \Delta x}{m\langle n \rangle} \cdot \int_0^{+\infty} |W(q)|^2 dq \quad (4)$$

Moreover, the function

$$\text{rect}(x) = \begin{cases} 1, & |x| < 1/2 \\ 0, & \text{otherwise} \end{cases} \quad (5)$$

allows to rewrite Eq. (3) as a piecewise function

$$|W(q)|^2 = \begin{cases} (q)^2 \cdot |H(q)|^2 \cdot (\text{sinc}^2(\pi q \Delta x))^2, & 0 < q < \frac{1}{2\Delta x}, \quad k = 0 \\ \left(q - \frac{k}{\Delta x}\right)^2 \cdot \left|H\left(q - \frac{k}{\Delta x}\right)\right|^2 \cdot (\text{sinc}^2(\pi q \Delta x))^2, & \left(\frac{2k-1}{2\Delta x}\right) < q < \left(\frac{2k+1}{2\Delta x}\right), \quad k \neq 0 \end{cases} \quad (6)$$

By combining Eq. (4) and Eq. (6) we obtain

$$\sigma^2 = \frac{2\pi^2 \Delta x}{m\langle n \rangle} \left( \int_0^{1/2\Delta x} |W(q)|^2 dq + \sum_k \int_{(2k-1)/2\Delta x}^{(2k+1)/2\Delta x} |W(q)|^2 dq \right) \equiv \frac{\beta}{m\langle n \rangle} \quad (7)$$

where  $\beta$  has the dimension of a squared spatial frequency.

The Nyquist frequency ( $q_{Ny}$ ) of a CT image sampled with a voxel of linear size  $\Delta x$ , is  $q_{Ny} = 1/2\Delta x$ . In the backprojection process, the frequency components of the projection data which exceed  $q_{Ny}$  are folded back into a region below  $q_{Ny}$  due to the discrete sampling. In Eq. (7) this means that the integrals in the summation (of  $|W(q)|^2$  for  $q > q_{Ny}$ ) are the contributions of the aliasing effect to the global noise as shown in Figure A1.

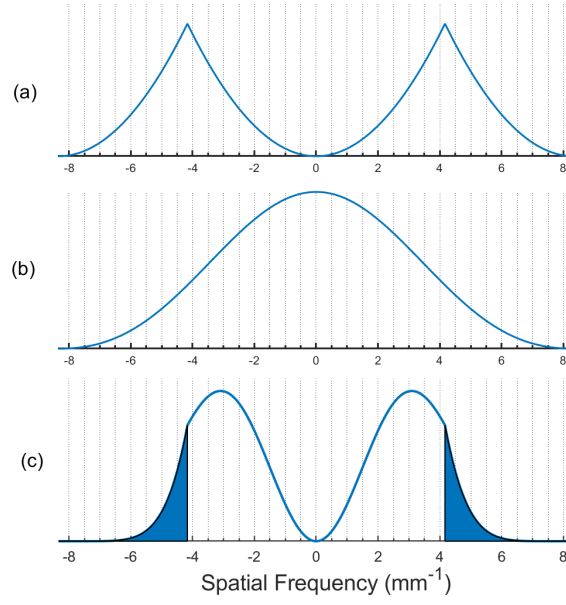

Figure A1:  $\Delta x = 0.120 \text{ mm}$  (a) frequency response of the square of Ram-Lak filter; (b) frequency response of the square of the linear interpolation kernel, i.e.  $(\text{sinc}^2(\pi q \Delta x))^2$ ; (c) spectral response of the reconstruction algorithm ( $|W(q)|^2$ , Eq. (3)). The shaded area is the noise which is folded back (aliasing).

The integrals in Eq. (7) can be evaluated numerically. We used Matlab for numerical integrations and, for a pixel of size  $\Delta x = 0.12 \text{ mm}$  and a Ram-Lak filter, we obtained

$$\sigma_{\text{Ram-Lak}}^2 = \frac{\beta_{\text{Ram-Lak}}}{m\langle n \rangle} \approx \frac{2\pi^2 \Delta x}{m\langle n \rangle} (9.448 + \mathbf{1.737}) \approx \frac{26.49}{m\langle n \rangle} \text{ mm}^{-2} \quad (8)$$

In Eq. (8) the contribution of Aliasing to the noise is in bold. The results for Eq. (7) when using the apodization windows listed in Table A1 are reported in Table A2.

| Filter      | $\sigma^2$                                                                                                                       | $\beta \text{ (mm}^{-2}\text{)}$     |
|-------------|----------------------------------------------------------------------------------------------------------------------------------|--------------------------------------|
| Ram-Lak     | $\frac{2\pi^2 \Delta x}{m\langle n \rangle} (9.448 + \mathbf{1.737}) \approx \frac{26.49}{m\langle n \rangle} \text{ mm}^{-2}$   | $\beta_{\text{Ram-Lak}} = 26.49$     |
| Shepp-Logan | $\frac{2\pi^2 \Delta x}{m\langle n \rangle} (6.457 + \mathbf{0.8822}) \approx \frac{17.38}{m\langle n \rangle} \text{ mm}^{-2}$  | $\beta_{\text{Shepp-Logan}} = 17.38$ |
| Hamming     | $\frac{2\pi^2 \Delta x}{m\langle n \rangle} (1.8169 + \mathbf{0.0457}) \approx \frac{4.411}{m\langle n \rangle} \text{ mm}^{-2}$ | $\beta_{\text{Hamming}} = 4.411$     |
| Hann        | $\frac{2\pi^2 \Delta x}{m\langle n \rangle} (1.5679 + \mathbf{0.0224}) \approx \frac{3.714}{m\langle n \rangle} \text{ mm}^{-2}$ | $\beta_{\text{Hann}} = 3.714$        |

Table A2:  $\sigma^2$  for different FBP filters

The noise variance calculated in Eq. (7) is function of the mean number of registered X-ray quanta  $\langle n \rangle$ . According to the Lambert-Beer law, considering a CT scan with a monochromatic parallel beam of energy E,  $\langle n \rangle$  is function of the number of incident quanta to the sample  $\langle n \rangle_0$ , the geometry of the sample and the distribution of the linear attenuation coefficients  $\mu_{Sample}(x, y, E)$  of which the sample is made. For a homogeneous circular sample of radius R, the transmitted X-ray quanta  $\langle n \rangle$  passing from the center is:

$$\langle n \rangle = \langle n \rangle_0 \cdot e^{-2 \int_0^R \mu_{Sample} dR} = \langle n \rangle_0 \cdot e^{-2\mu_{Sample} \cdot R} \quad (9)$$

Indicating the total number of photons per pixel impinging on the phantom as  $N_{ph} = m\langle n \rangle_0$  and by combining (7) and (9), the variance  $\sigma^2(0,0)$  at the center of the CT reconstruction with FBP is:

$$\sigma^2(0,0) = \frac{\beta}{N_{ph} \cdot e^{-2\mu_{Sample} \cdot R}} \quad (10)$$

We underline that, if the sample is placed at a some distance D from the detector and the space is filled with air, the Eq. (10) has to be corrected for the attenuation of the air:

$$\sigma_{corr}^2(0,0) = \frac{\beta}{N_{ph} \cdot e^{-2\mu_{Sample} \cdot R}} \cdot \frac{1}{e^{-\mu_{air} \cdot D}} \quad (11)$$

where  $\mu_{air}$  is the linear attenuation coefficient of the air.

## References

1. Cunningham I. Applied Linear-Systems Theory. In: *Van Metter R. L., Beutel J., Kundel H. L. Handbook of Medical Imaging* Vol. 1. Bellingham:Press SPIE; 2000:79-162.
2. Riederer, S. J., Pelc, N. J. & Chesler, D. A., The noise power spectrum in computed X-ray tomography. *Phys. Med. Biol.* **23** (3), 446, <https://doi.org/10.1088/0031-9155/23/3/008> (1978).
3. Hanson, K. M., Detectability in computed tomographic images. *Med. Phys.* **6** (5), 441-451, <https://doi.org/10.1118/1.594534> (1979).
4. Wagner, R. F., Brown, D. G. & Pastel, M. S., Application of information theory to the assessment of computed tomography. *Med. Phys.* **6** (2), 83-94, <https://doi.org/10.1118/1.594559> (1979).
5. Faulkner, K. & Moores, B. M., Noise and contrast detection in computed tomography images. *Phys. Med. Biol.* **29** (4), 329, <https://doi.org/10.1088/0031-9155/29/4/003> (1984).
6. Kijewski, M. F. & Judy, P. F., The noise power spectrum of CT images. *Phys. Med. Biol.* **32** (5), 565, <https://doi.org/10.1088/0031-9155/32/5/003> (1987).
